# Supplementary material for: Real Workload-Situated Training in COVID-19 Prevention of General Practice Residents in China: A Situated Cognition Study
Source: Research Square preprint supplement (doi:10.21203/rs.3.rs-854514/v1), 2021-10-12
Supplement: Supplementary file 1 [file 113f00307a7c41c519fc31ac.xlsx]

## Sheet: Sheet1
	item	nunmber	percentage(%)
	Gender
	male	53	28.9617
	female	130	71.0383
	Grade		0
	1st year residnets	63	34.4262
	2nd year residnets	52	28.4153
	3rd year residnets	60	32.7869
	senior residents	8	4.37158
	How many months after the COVID-19 outbreak when the participants taking the training task		0
	< one month	20	10.929
	1~3 month	43	23.4973
	4~6 month	64	34.9727
	》6 month	56	30.6011
	How many CHHs the participants taking the training task		0
	1	81	44.2623
	2	61	33.3333
	3	23	12.5683
	4	18	9.83607
