# Supplementary material for: Real Workload-Situated Training in COVID-19 Prevention of General Practice Residents in China: A Situated Cognition Study
Source: Research Square preprint supplement (doi:10.21203/rs.3.rs-854514/v1), 2021-10-12
Supplement: Supplementary file 3 [file fb607868a160ba4d1ee3c459.xlsx]

## Sheet: Sheet1
degree/percentage(%)	mental and cognitive stress	physical burden	time urgency	degree of effort required	task pressure	frustration
Heavy	12.06	20.5	21.9	21.9	11.3	11.3
Middle	62.4	60.9	61	65.2	62.4	62.4
Light	25.54	18.6	17.1	12.9	26.3	26.3
