# Supplementary material for: Real Workload-Situated Training in COVID-19 Prevention of General Practice Residents in China: A Situated Cognition Study
Source: Research Square preprint supplement (doi:10.21203/rs.3.rs-854514/v1), 2021-10-12
Supplement: Supplementary file 4 [file dd31155465fb87bb5bd0d788.xlsx]

## Sheet: Sheet1
序号	提交答卷时间	所用时间	来源	来源详情	来自IP	1 您是否参与了社区防疫工作	2 您参与防疫工作时 所属身份是	3 您参与疫情防控，是在疫情发生后几个月	4 (玉林社区)	4 (望江路社区)	4 (红牌楼社区)	4 (建设路社区)	4 (芳草社区)	4 (华阳社区)	4 (跳伞塔社区)	5 (预检分诊)	5 (隔离酒店)	5 (病例转运)	5 (流行病学调查)	5 (其他社区防控)	6 (传染病报告制度)	6 (穿脱隔离衣)	6 (社区院感防控)	6 (新冠传播及防控要点)	6 (其他)	7 (本科室老师)	7 (医院相关部门老师)	7 (社区基地老师)	7 (基层政府、街道办及酒店工作人员)	7 (师兄师姐及其他老师)	8. 您参与防控工作时，精神和认知压力程度	9. 您完成防控工作时，身体和体力负担大吗	10. 您完成防控工作时，时间紧迫感强吗	11.您完成防控工作时，与其他工作相比，需要的努力程度如何	12.您参与完成防控工作期间，会有任务压迫感、压力或担心吗	13 参与COVID19 疫情防控，您培训获得感满意度分值是	14 您是否愿意参与疫情防控和继续接受相关培训	15(传染病基础知识)	15(穿脱隔离衣及其它无菌操作)	15(院感培训)	15(其他)	15(无)	16(本科教育)	16(规培阶段)	16(继续教育)	16(网上自学或其他)	16(无)	17 .如果将来您负责一个社区的疫情防控工作，您能达到的水平是	您的性别
1	2021/3/19 16:39:41	42秒	微信	N/A	125.71.227.66(四川-成都)	1	3	3	0	0	1	1	0	1	0	0	1	0	0	0	0	0	1	0	0	0	0	0	1	0	3	3	5	3	3	97	2	0	0	0	0	1	0	0	0	0	1	5	(空)
2	2021/3/19 16:44:07	58秒	微信	N/A	125.71.227.66(四川-成都)	1	3	2	0	1	0	0	0	0	0	0	0	1	0	0	0	1	1	0	0	0	1	0	0	0	3	2	2	2	3	90	2	1	0	0	0	0	0	0	1	0	0	3	男
3	2021/3/19 17:01:16	107秒	手机提交	直接访问	60.255.166.218(四川-成都)	1	2	4	0	1	0	0	0	1	0	1	0	1	1	0	1	1	1	1	0	1	1	1	0	1	3	4	3	3	2	62	4	1	1	1	0	0	1	1	1	1	0	4	(空)
4	2021/3/19 17:01:33	114秒	手机提交	直接访问	223.104.214.148(四川-宜宾)	1	1	4	0	0	0	0	1	0	0	0	1	0	0	0	0	1	0	1	1	0	1	0	1	0	3	4	4	3	3	93	2	0	1	1	1	0	1	1	1	1	0	1	女
5	2021/3/19 17:01:34	35秒	手机提交	直接访问	119.4.170.167(四川-成都)	2	-3	-3	-3	-3	-3	-3	-3	-3	-3	-3	-3	-3	-3	-3	-3	-3	-3	-3	-3	-3	-3	-3	-3	-3	-3	-3	-3	-3	-3	-3	4	0	0	0	0	1	1	0	0	0	0	1	(空)
6	2021/3/19 17:07:09	96秒	手机提交	直接访问	117.139.254.77(四川-成都)	1	2	4	0	0	0	0	0	1	0	1	0	0	0	0	0	0	0	1	0	0	0	1	0	0	2	3	3	3	3	94	4	1	1	1	0	0	1	1	0	0	0	1	女
7	2021/3/19 17:08:20	247秒	手机提交	直接访问	125.70.170.50(四川-成都)	1	1	2	0	1	0	0	1	0	1	1	1	0	1	0	0	1	1	0	0	0	0	1	0	0	4	3	3	3	3	85	2	1	1	1	0	0	1	1	1	0	0	2	男
8	2021/3/19 17:11:39	210秒	手机提交	直接访问	117.136.82.212(四川-未知)	1	2	3	1	1	1	1	0	0	0	1	0	0	0	0	0	1	0	0	0	0	1	0	0	0	3	4	3	3	4	66	4	0	1	1	0	0	0	1	0	0	0	3	女
9	2021/3/19 17:12:32	279秒	手机提交	直接访问	223.104.214.140(四川-宜宾)	1	2	2	0	0	0	0	1	0	0	1	1	0	0	0	1	1	1	1	0	1	0	1	0	0	2	1	2	3	2	87	4	1	1	1	0	0	0	1	1	0	0	2	女
10	2021/3/19 17:16:13	64秒	手机提交	直接访问	112.193.49.66(四川-成都)	1	1	1	1	0	0	0	0	0	0	1	0	0	1	0	0	0	0	1	0	0	1	1	0	0	2	2	2	2	2	72	3	1	0	0	0	0	1	0	0	0	0	2	(空)
11	2021/3/19 17:27:57	39秒	手机提交	直接访问	118.115.114.250(四川-成都)	2	-3	-3	-3	-3	-3	-3	-3	-3	-3	-3	-3	-3	-3	-3	-3	-3	-3	-3	-3	-3	-3	-3	-3	-3	-3	-3	-3	-3	-3	-3	4	1	0	0	0	0	1	0	0	0	0	1	女
12	2021/3/19 17:31:16	38秒	手机提交	直接访问	39.144.137.216(四川-成都)	2	-3	-3	-3	-3	-3	-3	-3	-3	-3	-3	-3	-3	-3	-3	-3	-3	-3	-3	-3	-3	-3	-3	-3	-3	-3	-3	-3	-3	-3	-3	4	1	1	1	0	0	1	1	0	1	0	1	男
13	2021/3/19 17:42:34	163秒	手机提交	直接访问	117.136.63.136(四川-成都)	2	-3	-3	-3	-3	-3	-3	-3	-3	-3	-3	-3	-3	-3	-3	-3	-3	-3	-3	-3	-3	-3	-3	-3	-3	-3	-3	-3	-3	-3	-3	5	0	1	0	0	0	1	0	0	0	0	1	女
14	2021/3/19 17:45:45	194秒	手机提交	直接访问	171.210.219.17(四川-成都)	1	3	2	0	0	1	0	0	1	0	1	0	0	0	1	1	1	0	1	0	0	1	0	0	0	3	3	1	2	2	83	4	1	1	1	0	0	1	1	0	0	0	1	女
15	2021/3/19 17:47:53	101秒	手机提交	直接访问	223.104.216.21(四川-成都)	1	1	4	0	0	1	0	0	0	0	1	1	0	0	0	1	1	1	1	0	1	1	1	1	1	1	3	3	2	2	95	4	1	1	1	0	0	1	0	0	0	0	1	女
16	2021/3/19 17:48:17	124秒	手机提交	直接访问	182.129.26.230(四川-南充)	1	1	4	1	1	0	0	0	0	0	1	0	0	0	0	0	0	1	0	0	0	0	1	0	0	2	3	3	3	3	68	2	1	1	1	0	0	1	0	0	0	0	1	女
17	2021/3/19 18:19:38	50秒	手机提交	直接访问	223.87.35.146(四川-成都)	2	-3	-3	-3	-3	-3	-3	-3	-3	-3	-3	-3	-3	-3	-3	-3	-3	-3	-3	-3	-3	-3	-3	-3	-3	-3	-3	-3	-3	-3	-3	3	1	1	1	0	0	0	1	0	0	0	1	女
18	2021/3/19 18:32:29	217秒	手机提交	直接访问	111.9.1.60(四川-成都)	1	3	2	0	0	0	0	1	0	0	1	0	0	1	0	1	1	1	1	0	0	1	1	0	0	2	2	3	3	3	60	4	1	1	1	0	0	1	1	0	0	0	3	男
19	2021/3/19 19:03:27	95秒	手机提交	直接访问	117.136.62.24(四川-成都)	1	1	2	0	1	0	0	0	0	0	1	0	0	0	0	0	0	0	1	0	0	0	1	0	0	3	3	3	3	3	56	4	1	1	0	0	0	0	1	0	0	0	1	女
20	2021/3/19 19:36:59	101秒	手机提交	直接访问	171.214.214.164(四川-成都)	1	2	4	0	0	1	0	0	0	0	1	0	0	0	0	1	1	1	1	0	1	1	0	0	0	3	3	3	3	3	63	4	1	1	1	0	0	1	1	0	1	0	2	(空)
21	2021/3/19 19:38:34	38秒	手机提交	直接访问	139.206.207.62(四川-凉山)	2	-3	-3	-3	-3	-3	-3	-3	-3	-3	-3	-3	-3	-3	-3	-3	-3	-3	-3	-3	-3	-3	-3	-3	-3	-3	-3	-3	-3	-3	-3	4	1	1	0	0	0	1	1	0	0	0	1	(空)
22	2021/3/19 19:42:21	112秒	手机提交	直接访问	171.209.66.146(四川-成都)	1	1	4	1	0	0	0	0	0	0	0	0	0	1	0	1	1	1	1	0	1	1	1	0	1	1	1	1	2	2	98	5	1	0	1	0	0	1	0	0	0	0	1	女
23	2021/3/19 19:43:39	69秒	手机提交	直接访问	223.104.216.36(四川-成都)	2	-3	-3	-3	-3	-3	-3	-3	-3	-3	-3	-3	-3	-3	-3	-3	-3	-3	-3	-3	-3	-3	-3	-3	-3	-3	-3	-3	-3	-3	-3	3	1	1	1	0	0	1	1	1	1	0	1	男
24	2021/3/19 19:46:58	456秒	手机提交	直接访问	117.136.65.80(四川-成都)	1	2	4	0	1	0	0	0	0	0	1	0	0	0	0	0	0	1	1	0	0	0	1	0	0	2	2	3	4	3	95	4	1	1	1	0	0	1	1	0	0	0	1	男
25	2021/3/19 22:15:23	66秒	手机提交	直接访问	112.44.121.235(四川-成都)	2	-3	-3	-3	-3	-3	-3	-3	-3	-3	-3	-3	-3	-3	-3	-3	-3	-3	-3	-3	-3	-3	-3	-3	-3	-3	-3	-3	-3	-3	-3	5	1	1	1	0	0	1	1	0	0	0	5	女
26	2021/3/19 22:35:29	88秒	手机提交	直接访问	223.87.35.47(四川-成都)	1	2	2	1	1	1	0	0	0	0	1	1	1	1	0	1	1	0	0	0	1	1	1	0	0	3	3	3	3	3	79	2	1	1	1	0	0	1	1	1	0	0	2	男
27	2021/3/19 22:59:09	69秒	手机提交	直接访问	171.210.211.253(四川-成都)	2	-3	-3	-3	-3	-3	-3	-3	-3	-3	-3	-3	-3	-3	-3	-3	-3	-3	-3	-3	-3	-3	-3	-3	-3	-3	-3	-3	-3	-3	-3	4	1	1	1	1	0	1	1	0	1	0	1	男
28	2021/3/19 23:01:25	192秒	手机提交	直接访问	218.203.231.52(四川-成都)	1	3	2	1	0	1	0	1	1	1	1	1	0	1	0	1	1	1	1	0	0	1	1	0	0	3	3	3	4	3	82	4	0	1	1	0	0	1	1	0	0	0	1	女
29	2021/3/19 23:54:23	149秒	手机提交	直接访问	223.85.182.15(四川-成都)	1	2	1	0	1	1	0	1	0	0	1	0	0	1	1	0	1	0	0	0	0	0	1	0	0	3	3	3	3	3	90	4	1	1	1	0	0	1	1	0	1	0	2	女
30	2021/3/20 0:36:45	120秒	手机提交	直接访问	125.70.169.129(四川-成都)	1	2	1	1	1	0	0	0	0	1	1	0	0	1	0	1	1	1	1	0	0	0	1	0	0	3	3	3	3	3	51	4	0	1	1	0	0	1	1	0	0	0	2	女
31	2021/3/20 7:38:49	145秒	手机提交	直接访问	117.136.62.34(四川-成都)	1	2	3	0	0	0	1	0	1	0	1	0	0	0	0	1	1	0	1	0	0	0	1	0	0	2	3	3	3	3	82	4	1	1	1	0	0	1	1	0	0	0	2	女
32	2021/3/20 10:01:01	97秒	手机提交	直接访问	101.206.169.149(四川-成都)	1	2	3	0	1	0	0	0	0	0	1	1	0	0	0	0	1	1	1	0	0	0	1	1	1	4	4	4	3	3	84	2	1	1	1	0	0	1	1	1	1	0	1	女
33	2021/3/20 14:10:02	198秒	手机提交	直接访问	171.210.195.85(四川-成都)	1	2	1	0	1	0	0	0	0	0	1	0	0	0	1	1	1	1	1	0	1	1	1	0	0	3	4	3	4	3	81	3	0	1	1	0	0	0	1	1	0	0	2	女
34	2021/3/20 21:56:07	59秒	手机提交	直接访问	117.175.129.66(四川-成都)	2	-3	-3	-3	-3	-3	-3	-3	-3	-3	-3	-3	-3	-3	-3	-3	-3	-3	-3	-3	-3	-3	-3	-3	-3	-3	-3	-3	-3	-3	-3	4	0	1	1	0	0	0	0	1	1	0	1	女
35	2021/3/20 22:53:45	154秒	手机提交	直接访问	171.223.195.152(四川-成都)	1	3	4	0	0	0	0	1	0	0	0	1	0	0	0	0	1	1	1	0	0	1	1	0	0	1	1	1	1	1	90	4	1	1	1	0	0	1	1	0	0	0	1	男
36	2021/3/21 9:08:49	132秒	手机提交	直接访问	222.209.26.193(四川-成都)	1	1	1	0	1	0	0	0	0	0	1	0	0	1	0	0	1	0	1	0	0	0	1	0	0	3	3	3	3	3	50	4	1	1	1	0	0	1	1	0	0	0	3	女
37	2021/3/22 15:03:22	68秒	手机提交	直接访问	223.104.214.173(四川-宜宾)	2	-3	-3	-3	-3	-3	-3	-3	-3	-3	-3	-3	-3	-3	-3	-3	-3	-3	-3	-3	-3	-3	-3	-3	-3	-3	-3	-3	-3	-3	-3	4	0	1	1	0	0	1	0	0	1	0	1	女
38	2021/3/22 15:05:23	39秒	手机提交	直接访问	223.104.9.137(四川-成都)	2	-3	-3	-3	-3	-3	-3	-3	-3	-3	-3	-3	-3	-3	-3	-3	-3	-3	-3	-3	-3	-3	-3	-3	-3	-3	-3	-3	-3	-3	-3	3	1	0	1	0	0	1	0	0	0	0	1	女
39	2021/3/22 15:06:49	369秒	微信	N/A	117.136.62.67(四川-成都)	1	3	2	1	0	0	0	1	1	0	1	1	0	1	0	1	1	1	1	0	0	1	1	0	0	3	3	4	3	2	76	5	0	1	1	0	0	1	1	0	1	0	2	女
40	2021/3/22 15:07:32	112秒	手机提交	直接访问	61.157.13.13(四川-成都)	1	1	4	0	0	0	0	0	0	1	1	0	0	1	0	0	1	0	1	0	0	1	0	0	0	3	3	3	3	3	76	4	1	1	1	0	0	1	0	0	0	0	1	女
41	2021/3/22 15:13:20	147秒	手机提交	直接访问	118.115.206.229(四川-成都)	1	1	1	0	0	0	0	0	1	0	1	0	0	1	0	1	1	1	1	0	0	1	1	0	0	2	2	2	3	2	82	3	1	1	1	0	0	1	1	0	1	0	2	李佩溪
42	2021/3/22 15:17:23	110秒	手机提交	直接访问	223.104.9.127(四川-成都)	1	2	4	1	1	1	1	0	0	0	1	0	0	0	0	0	1	0	0	0	0	1	0	0	0	3	3	3	3	3	66	4	1	1	1	0	0	1	1	0	0	0	3	女
43	2021/3/22 15:27:54	84秒	手机提交	直接访问	61.157.13.10(四川-成都)	1	2	4	0	1	1	0	1	0	0	1	1	0	0	0	1	1	1	1	0	1	1	1	0	0	1	1	1	1	1	74	3	1	1	1	0	0	1	1	0	1	0	1	女
44	2021/3/22 15:29:27	109秒	手机提交	直接访问	171.210.143.102(四川-成都)	1	2	4	0	0	0	0	0	1	0	1	0	0	0	0	0	0	1	1	0	0	0	1	0	1	3	3	3	3	3	67	4	1	1	1	0	0	1	1	0	0	0	1	(空)
45	2021/3/22 15:34:11	1356秒	手机提交	直接访问	223.104.216.49(四川-成都)	2	-3	-3	-3	-3	-3	-3	-3	-3	-3	-3	-3	-3	-3	-3	-3	-3	-3	-3	-3	-3	-3	-3	-3	-3	-3	-3	-3	-3	-3	-3	4	1	1	1	0	0	1	1	0	0	0	1	女
46	2021/3/22 15:43:31	79秒	手机提交	直接访问	223.104.214.148(四川-宜宾)	2	-3	-3	-3	-3	-3	-3	-3	-3	-3	-3	-3	-3	-3	-3	-3	-3	-3	-3	-3	-3	-3	-3	-3	-3	-3	-3	-3	-3	-3	-3	4	1	0	1	0	0	0	0	1	1	0	3	女
47	2021/3/22 15:52:15	199秒	手机提交	直接访问	117.136.62.73(四川-成都)	1	2	3	0	0	0	0	1	0	0	0	1	1	0	0	1	1	0	1	0	1	1	1	0	0	3	3	3	2	3	78	4	1	1	1	0	0	1	1	0	0	0	1	女
48	2021/3/22 16:05:54	114秒	手机提交	直接访问	117.136.63.182(四川-成都)	1	4	3	0	0	0	0	1	0	0	0	1	0	0	0	1	1	1	1	0	1	1	1	1	1	2	3	3	3	3	77	4	1	0	1	0	0	1	1	1	1	0	3	女
49	2021/3/22 16:18:04	84秒	手机提交	直接访问	61.157.13.15(四川-成都)	1	2	4	0	1	0	0	0	0	0	1	0	0	0	0	0	1	0	1	0	0	0	1	0	0	2	3	2	2	2	70	4	0	0	1	0	0	1	1	0	0	0	1	女
50	2021/3/22 17:16:16	307秒	微信	N/A	223.104.214.145(四川-宜宾)	1	2	1	0	1	0	1	0	1	0	1	0	0	1	1	1	1	1	1	0	1	1	1	0	0	3	3	4	5	3	85	4	1	1	1	0	0	1	1	0	0	0	3	女
51	2021/3/22 17:23:30	121秒	手机提交	直接访问	125.70.168.96(四川-成都)	1	1	4	0	0	0	0	1	0	0	0	1	0	0	0	1	1	0	0	0	0	0	1	0	0	4	4	4	4	4	80	4	1	1	1	0	0	0	1	0	0	0	2	(空)
52	2021/3/22 22:44:06	2931秒	微信	N/A	171.214.215.218(四川-成都)	1	4	1	0	0	0	0	1	0	0	1	1	0	1	1	1	1	1	1	0	1	1	1	1	1	3	3	3	3	3	100	5	1	1	1	1	0	1	1	0	0	0	2	女
53	2021/3/22 22:47:45	3132秒	微信	N/A	171.214.215.218(四川-成都)	1	4	1	0	0	0	0	1	0	0	1	1	0	1	1	1	1	1	1	0	1	1	1	1	1	3	3	3	3	3	100	5	1	1	1	0	0	1	1	0	0	0	2	女
54	2021/3/22 23:10:01	217秒	手机提交	直接访问	101.206.170.15(四川-成都)	1	2	4	1	0	0	1	0	0	0	1	0	0	1	0	1	1	1	1	0	1	1	1	0	0	3	4	4	5	3	73	5	1	1	1	0	0	1	1	1	1	0	4	男
55	2021/3/23 12:56:06	345秒	微信	N/A	117.136.64.70(四川-成都)	1	2	2	0	1	0	0	0	0	0	1	0	0	1	1	1	0	1	1	0	1	0	1	0	0	4	4	4	4	4	80	4	0	1	1	0	0	1	1	0	1	0	5	男
56	2021/3/24 17:27:08	146秒	链接	http://mail.qq.com/	222.212.88.201(四川-成都)	1	3	2	0	1	0	0	0	0	0	1	0	0	0	1	1	1	1	1	0	1	1	0	0	0	2	2	3	4	2	64	4	1	1	1	0	0	1	0	0	0	0	5	女
57	2021/5/18 18:20:08	47秒	微信	N/A	222.209.151.142(四川-成都)	2	-3	-3	-3	-3	-3	-3	-3	-3	-3	-3	-3	-3	-3	-3	-3	-3	-3	-3	-3	-3	-3	-3	-3	-3	-3	-3	-3	-3	-3	-3	4	0	0	0	0	1	1	0	0	0	0	1	女
58	2021/5/18 18:20:18	44秒	微信	N/A	171.92.125.8(四川-成都)	2	-3	-3	-3	-3	-3	-3	-3	-3	-3	-3	-3	-3	-3	-3	-3	-3	-3	-3	-3	-3	-3	-3	-3	-3	-3	-3	-3	-3	-3	-3	3	0	1	1	0	0	1	1	0	0	0	2	女
59	2021/5/18 18:20:22	50秒	微信	N/A	112.44.77.48(四川-成都)	2	-3	-3	-3	-3	-3	-3	-3	-3	-3	-3	-3	-3	-3	-3	-3	-3	-3	-3	-3	-3	-3	-3	-3	-3	-3	-3	-3	-3	-3	-3	4	0	0	0	0	1	1	0	0	1	0	5	女
60	2021/5/18 18:20:25	50秒	微信	N/A	223.104.9.147(四川-成都)	1	4	2	0	0	0	0	1	0	0	0	1	0	0	0	1	0	0	0	0	1	0	1	0	0	4	3	3	4	5	84	4	0	0	1	0	0	1	1	0	0	0	1	安康
61	2021/5/18 18:20:37	53秒	微信	N/A	171.219.0.87(四川-成都)	2	-3	-3	-3	-3	-3	-3	-3	-3	-3	-3	-3	-3	-3	-3	-3	-3	-3	-3	-3	-3	-3	-3	-3	-3	-3	-3	-3	-3	-3	-3	4	1	1	1	0	0	1	0	0	1	0	1	女
62	2021/5/18 18:20:47	58秒	微信	N/A	223.104.9.244(四川-成都)	2	-3	-3	-3	-3	-3	-3	-3	-3	-3	-3	-3	-3	-3	-3	-3	-3	-3	-3	-3	-3	-3	-3	-3	-3	-3	-3	-3	-3	-3	-3	5	1	1	1	0	0	1	1	0	1	0	1	女
63	2021/5/18 18:20:55	80秒	微信	N/A	125.71.64.103(四川-成都)	1	3	3	0	1	0	0	0	0	0	1	0	0	0	0	1	1	1	1	0	0	0	1	0	0	3	3	3	3	3	90	4	1	1	1	0	0	0	1	1	0	0	2	男
64	2021/5/18 18:20:56	68秒	微信	N/A	117.136.65.104(四川-成都)	1	1	4	0	0	0	0	0	1	0	1	0	0	1	0	0	1	0	1	0	0	0	1	0	0	2	4	4	3	3	100	4	1	1	1	0	0	1	1	0	1	0	3	女
65	2021/5/18 18:20:59	63秒	微信	N/A	118.112.152.71(四川-成都)	2	-3	-3	-3	-3	-3	-3	-3	-3	-3	-3	-3	-3	-3	-3	-3	-3	-3	-3	-3	-3	-3	-3	-3	-3	-3	-3	-3	-3	-3	-3	4	0	0	0	0	1	0	0	0	1	0	1	女
66	2021/5/18 18:21:07	71秒	微信	N/A	117.136.62.21(四川-成都)	2	-3	-3	-3	-3	-3	-3	-3	-3	-3	-3	-3	-3	-3	-3	-3	-3	-3	-3	-3	-3	-3	-3	-3	-3	-3	-3	-3	-3	-3	-3	5	1	0	1	1	0	0	0	0	0	1	1	女
67	2021/5/18 18:21:12	101秒	微信	N/A	117.136.63.181(四川-成都)	1	2	2	0	1	0	0	1	0	1	1	1	0	0	1	0	1	1	1	0	0	1	1	0	1	2	2	2	3	3	77	4	1	1	1	0	0	1	1	1	1	0	3	男
68	2021/5/18 18:21:17	82秒	微信	N/A	183.222.203.202(四川-成都)	2	-3	-3	-3	-3	-3	-3	-3	-3	-3	-3	-3	-3	-3	-3	-3	-3	-3	-3	-3	-3	-3	-3	-3	-3	-3	-3	-3	-3	-3	-3	3	1	1	1	1	0	1	1	0	1	0	1	男
69	2021/5/18 18:21:20	94秒	微信	N/A	171.210.222.70(四川-成都)	1	3	4	0	0	0	0	1	1	0	1	1	0	0	0	1	1	1	1	0	0	0	1	0	0	3	3	3	3	3	81	2	1	1	1	0	0	1	1	0	0	0	4	男
70	2021/5/18 18:21:21	83秒	微信	N/A	101.206.166.213(四川-成都)	1	3	1	0	0	0	0	0	1	0	1	0	0	0	0	1	1	1	0	0	1	0	1	1	0	3	3	3	3	3	84	2	0	1	1	0	0	0	1	0	0	0	2	男
71	2021/5/18 18:21:24	106秒	微信	N/A	182.149.160.156(四川-成都)	2	-3	-3	-3	-3	-3	-3	-3	-3	-3	-3	-3	-3	-3	-3	-3	-3	-3	-3	-3	-3	-3	-3	-3	-3	-3	-3	-3	-3	-3	-3	5	1	1	1	0	0	1	1	0	1	0	1	男
72	2021/5/18 18:21:31	121秒	微信	N/A	125.70.171.147(四川-成都)	1	2	4	0	1	0	0	0	1	0	1	0	0	0	0	1	1	1	1	0	0	0	1	0	0	3	3	3	4	3	86	4	0	1	1	0	0	1	1	0	0	0	3	女
73	2021/5/18 18:21:33	113秒	微信	N/A	112.44.121.17(四川-成都)	1	1	4	0	0	1	0	0	0	0	1	0	0	0	0	1	1	1	1	0	1	1	1	0	0	3	3	3	3	3	95	5	1	1	1	0	0	1	1	1	1	0	5	女
74	2021/5/18 18:21:41	124秒	手机提交	直接访问	182.149.161.144(四川-成都)	1	1	2	0	0	0	0	0	1	0	1	0	0	1	0	1	1	0	1	0	0	1	1	0	0	3	3	3	3	3	80	4	1	0	0	0	0	1	0	0	0	0	4	女
75	2021/5/18 18:21:45	118秒	微信	N/A	223.104.9.226(四川-成都)	1	2	4	1	1	1	0	0	0	0	1	0	0	0	0	1	1	0	1	0	0	0	1	0	0	3	3	3	3	3	70	4	1	1	1	0	0	1	1	0	0	0	1	女
76	2021/5/18 18:21:45	126秒	微信	N/A	125.70.169.3(四川-成都)	1	1	4	0	1	1	0	1	0	0	1	1	0	0	0	1	1	1	1	0	1	1	1	0	1	1	1	1	1	1	76	3	1	1	1	0	0	0	1	0	1	0	1	女
77	2021/5/18 18:21:46	122秒	微信	N/A	112.44.121.197(四川-成都)	1	1	4	1	1	0	0	1	0	0	1	1	0	0	0	0	1	0	1	0	0	0	1	1	1	3	3	3	3	3	97	4	1	1	0	0	0	1	0	0	0	0	1	女
78	2021/5/18 18:21:46	126秒	微信	N/A	139.207.158.109(四川-成都)	2	-3	-3	-3	-3	-3	-3	-3	-3	-3	-3	-3	-3	-3	-3	-3	-3	-3	-3	-3	-3	-3	-3	-3	-3	-3	-3	-3	-3	-3	-3	4	1	1	1	0	0	1	1	0	1	0	5	女
79	2021/5/18 18:21:47	131秒	微信	N/A	222.196.131.109(四川-成都)	1	2	2	0	0	0	0	1	0	0	1	1	0	0	0	1	1	1	1	0	1	1	1	1	1	2	2	4	3	1	90	4	1	0	1	0	0	0	1	0	0	0	1	女
80	2021/5/18 18:21:48	110秒	微信	N/A	171.218.55.135(四川-成都)	1	1	1	0	0	0	0	1	0	0	0	0	0	1	0	1	1	1	1	0	1	0	1	0	0	1	1	1	1	1	100	4	1	1	1	0	0	1	1	1	0	0	1	男
81	2021/5/18 18:21:53	132秒	微信	N/A	222.196.131.109(四川-成都)	1	2	3	0	0	0	0	1	0	0	0	1	0	0	0	0	1	0	1	0	1	1	1	0	0	3	3	3	3	3	76	4	1	1	1	0	0	1	1	0	0	0	1	女
82	2021/5/18 18:21:54	139秒	微信	N/A	101.206.169.150(四川-成都)	1	1	4	0	1	1	0	1	0	0	1	0	0	0	0	1	1	1	1	0	1	1	1	0	1	3	3	3	3	3	100	5	1	1	0	0	0	1	0	0	1	0	1	女
83	2021/5/18 18:21:55	140秒	微信	N/A	61.157.13.15(四川-成都)	1	2	2	0	0	1	1	1	0	0	1	0	0	1	1	0	1	1	1	0	1	1	1	0	0	3	3	3	3	3	79	4	1	1	1	0	0	1	1	1	1	0	2	女
84	2021/5/18 18:21:56	135秒	手机提交	直接访问	222.212.9.220(四川-成都)	2	-3	-3	-3	-3	-3	-3	-3	-3	-3	-3	-3	-3	-3	-3	-3	-3	-3	-3	-3	-3	-3	-3	-3	-3	-3	-3	-3	-3	-3	-3	4	1	1	1	0	0	1	1	0	0	0	1	女
85	2021/5/18 18:21:56	149秒	微信	N/A	101.206.171.91(四川-成都)	1	2	2	0	0	1	0	0	0	0	1	0	0	1	0	0	1	1	0	0	0	1	1	0	0	3	3	3	3	3	78	4	1	1	1	0	0	0	1	0	0	0	2	(空)
86	2021/5/18 18:21:59	11秒	微信	N/A	223.104.214.148(四川-宜宾)	2	-3	-3	-3	-3	-3	-3	-3	-3	-3	-3	-3	-3	-3	-3	-3	-3	-3	-3	-3	-3	-3	-3	-3	-3	-3	-3	-3	-3	-3	-3	3	0	0	0	1	0	0	0	0	1	0	4	(空)
87	2021/5/18 18:22:07	151秒	微信	N/A	111.9.1.2(四川-成都)	1	2	3	0	1	0	0	0	1	0	1	0	0	0	0	0	1	0	1	0	0	0	1	0	0	3	3	4	3	3	78	4	1	1	1	0	0	1	1	0	0	0	2	女
88	2021/5/18 18:22:16	107秒	微信	N/A	119.4.252.172(四川-成都)	1	1	3	1	0	0	0	0	0	0	0	0	0	1	0	1	1	1	1	0	1	1	1	0	1	4	3	4	4	3	90	4	1	1	1	0	0	1	1	0	1	0	1	女
89	2021/5/18 18:22:18	144秒	微信	N/A	125.70.169.107(四川-成都)	1	2	2	1	0	1	0	0	0	0	0	0	0	1	1	0	0	0	1	1	0	0	1	0	0	1	1	3	2	1	100	4	0	1	1	0	0	1	0	0	0	0	1	女
90	2021/5/18 18:22:24	48秒	微信	N/A	61.157.13.16(四川-成都)	2	-3	-3	-3	-3	-3	-3	-3	-3	-3	-3	-3	-3	-3	-3	-3	-3	-3	-3	-3	-3	-3	-3	-3	-3	-3	-3	-3	-3	-3	-3	4	1	1	1	0	0	1	0	0	1	0	1	男
91	2021/5/18 18:22:25	56秒	微信	N/A	110.191.196.24(四川-成都)	2	-3	-3	-3	-3	-3	-3	-3	-3	-3	-3	-3	-3	-3	-3	-3	-3	-3	-3	-3	-3	-3	-3	-3	-3	-3	-3	-3	-3	-3	-3	4	1	1	1	0	0	0	1	1	1	0	1	女
92	2021/5/18 18:22:32	45秒	微信	N/A	112.193.243.76(四川-成都)	2	-3	-3	-3	-3	-3	-3	-3	-3	-3	-3	-3	-3	-3	-3	-3	-3	-3	-3	-3	-3	-3	-3	-3	-3	-3	-3	-3	-3	-3	-3	5	1	0	0	0	0	1	0	0	0	0	1	男
93	2021/5/18 18:22:32	84秒	微信	N/A	171.93.190.10(四川-成都)	1	4	2	0	0	0	0	1	0	0	1	1	1	1	0	1	1	1	1	0	1	1	1	1	1	1	1	2	4	3	85	5	1	1	1	0	0	1	1	1	0	0	2	女
94	2021/5/18 18:22:33	78秒	微信	N/A	222.209.9.253(四川-成都)	2	-3	-3	-3	-3	-3	-3	-3	-3	-3	-3	-3	-3	-3	-3	-3	-3	-3	-3	-3	-3	-3	-3	-3	-3	-3	-3	-3	-3	-3	-3	4	0	1	0	0	0	1	1	0	0	0	5	女
95	2021/5/18 18:22:51	68秒	微信	N/A	182.138.90.92(四川-成都)	2	-3	-3	-3	-3	-3	-3	-3	-3	-3	-3	-3	-3	-3	-3	-3	-3	-3	-3	-3	-3	-3	-3	-3	-3	-3	-3	-3	-3	-3	-3	4	1	1	0	0	0	1	0	0	0	0	1	女
96	2021/5/18 18:22:54	68秒	微信	N/A	223.104.9.135(四川-成都)	2	-3	-3	-3	-3	-3	-3	-3	-3	-3	-3	-3	-3	-3	-3	-3	-3	-3	-3	-3	-3	-3	-3	-3	-3	-3	-3	-3	-3	-3	-3	4	1	1	1	0	0	1	0	0	1	0	2	女
97	2021/5/18 18:22:56	165秒	微信	N/A	117.139.215.101(四川-成都)	1	2	2	1	0	1	0	1	1	0	1	1	0	1	0	1	1	1	1	0	0	1	1	0	0	3	3	3	3	3	76	4	0	1	1	0	0	1	1	0	1	0	1	女
98	2021/5/18 18:22:58	57秒	微信	N/A	117.136.64.250(四川-成都)	2	-3	-3	-3	-3	-3	-3	-3	-3	-3	-3	-3	-3	-3	-3	-3	-3	-3	-3	-3	-3	-3	-3	-3	-3	-3	-3	-3	-3	-3	-3	4	1	1	1	0	0	1	1	1	1	0	2	女
99	2021/5/18 18:22:59	37秒	微信	N/A	101.206.166.124(四川-成都)	2	-3	-3	-3	-3	-3	-3	-3	-3	-3	-3	-3	-3	-3	-3	-3	-3	-3	-3	-3	-3	-3	-3	-3	-3	-3	-3	-3	-3	-3	-3	4	1	1	1	0	0	1	0	0	1	0	1	女
100	2021/5/18 18:22:59	196秒	微信	N/A	183.222.201.194(四川-成都)	1	4	4	0	0	0	0	1	0	0	0	1	0	0	0	1	1	1	1	0	1	1	1	1	1	3	3	3	3	3	78	4	1	1	1	0	0	1	1	0	0	0	3	女
101	2021/5/18 18:23:05	79秒	微信	N/A	183.222.202.182(四川-成都)	2	-3	-3	-3	-3	-3	-3	-3	-3	-3	-3	-3	-3	-3	-3	-3	-3	-3	-3	-3	-3	-3	-3	-3	-3	-3	-3	-3	-3	-3	-3	4	0	1	1	0	0	0	1	0	1	0	1	男
102	2021/5/18 18:23:06	88秒	手机提交	直接访问	182.148.33.15(四川-成都)	1	1	4	0	0	1	0	1	0	0	1	1	0	1	0	1	1	1	1	0	1	1	1	0	1	1	3	2	3	3	91	4	1	1	1	0	0	1	1	0	1	0	5	女
103	2021/5/18 18:23:07	106秒	微信	N/A	117.174.84.250(四川-成都)	2	-3	-3	-3	-3	-3	-3	-3	-3	-3	-3	-3	-3	-3	-3	-3	-3	-3	-3	-3	-3	-3	-3	-3	-3	-3	-3	-3	-3	-3	-3	5	1	1	1	0	0	1	1	0	1	0	3	女
104	2021/5/18 18:23:10	147秒	微信	N/A	112.44.107.4(四川-成都)	1	2	3	0	0	0	1	1	0	0	1	1	0	0	0	1	1	1	1	0	1	0	1	1	0	3	3	3	3	3	81	4	0	0	0	0	1	1	0	0	1	0	1	女
105	2021/5/18 18:23:11	87秒	微信	N/A	117.136.62.63(四川-成都)	2	-3	-3	-3	-3	-3	-3	-3	-3	-3	-3	-3	-3	-3	-3	-3	-3	-3	-3	-3	-3	-3	-3	-3	-3	-3	-3	-3	-3	-3	-3	5	1	1	1	0	0	1	0	0	0	0	4	女
106	2021/5/18 18:23:12	154秒	微信	N/A	60.255.85.95(四川-成都)	1	2	1	1	1	1	0	1	1	0	1	0	0	1	1	1	1	1	1	0	1	1	1	0	1	3	3	3	3	3	52	4	1	1	1	0	0	1	1	1	1	0	1	女
107	2021/5/18 18:23:19	222秒	微信	N/A	117.176.248.12(四川-成都)	1	3	4	0	1	0	0	0	0	0	1	0	0	1	0	1	1	1	1	0	0	1	1	0	0	2	4	4	2	5	60	4	0	1	1	0	0	0	1	0	1	0	2	女
108	2021/5/18 18:23:20	236秒	手机提交	直接访问	222.211.214.236(四川-成都)	1	2	3	0	1	0	0	1	1	1	1	0	0	1	0	0	1	1	1	0	1	0	1	0	0	1	3	4	4	5	100	5	1	0	1	0	0	1	1	1	0	0	2	朱雅文
109	2021/5/18 18:23:22	21秒	微信	N/A	223.104.9.135(四川-成都)	2	-3	-3	-3	-3	-3	-3	-3	-3	-3	-3	-3	-3	-3	-3	-3	-3	-3	-3	-3	-3	-3	-3	-3	-3	-3	-3	-3	-3	-3	-3	4	1	1	1	0	0	1	0	0	1	0	2	女
110	2021/5/18 18:23:29	87秒	微信	N/A	117.173.130.2(四川-成都)	1	1	4	0	0	1	0	0	0	0	1	0	0	0	0	0	0	1	1	0	1	1	1	0	0	3	3	3	3	3	81	4	1	1	1	0	0	1	0	0	0	0	1	女
111	2021/5/18 18:23:33	117秒	微信	N/A	117.136.65.107(四川-成都)	1	1	4	0	0	1	0	0	0	0	1	0	0	0	0	0	0	1	1	0	0	0	1	0	1	3	4	3	4	4	76	5	1	1	1	0	0	1	1	0	1	0	1	女
112	2021/5/18 18:23:34	232秒	微信	N/A	112.44.77.51(四川-成都)	1	3	2	1	0	0	0	1	1	0	1	1	0	0	1	1	1	1	1	0	1	1	1	0	0	2	2	3	3	3	90	5	1	1	1	0	0	0	1	0	0	0	1	女
113	2021/5/18 18:23:35	139秒	微信	N/A	182.149.191.201(四川-成都)	1	1	3	1	0	0	0	1	1	0	1	0	1	1	0	1	1	1	1	0	1	1	1	0	1	3	2	4	3	3	100	5	1	1	1	0	0	0	1	0	0	0	1	女
114	2021/5/18 18:23:36	158秒	微信	N/A	117.132.184.3(内蒙古-呼和浩特)	1	1	2	0	0	0	0	0	1	0	1	0	0	0	0	0	1	1	1	0	1	0	1	0	0	4	4	4	3	4	74	4	0	0	1	0	0	1	0	0	0	0	1	男，2019级全科周博
115	2021/5/18 18:23:37	107秒	微信	N/A	112.44.107.4(四川-成都)	1	2	4	1	1	0	0	0	1	0	1	0	0	1	0	1	1	1	1	0	1	1	1	1	1	3	3	3	3	3	99	4	1	1	1	0	0	1	1	1	1	0	1	女
116	2021/5/18 18:23:40	109秒	微信	N/A	39.144.137.194(四川-成都)	2	-3	-3	-3	-3	-3	-3	-3	-3	-3	-3	-3	-3	-3	-3	-3	-3	-3	-3	-3	-3	-3	-3	-3	-3	-3	-3	-3	-3	-3	-3	4	1	1	1	0	0	1	0	0	0	0	1	女
117	2021/5/18 18:23:46	132秒	微信	N/A	117.136.64.253(四川-成都)	1	3	2	1	0	0	0	1	0	0	1	0	0	1	0	1	1	1	1	0	1	1	0	0	0	3	3	3	3	3	93	4	1	1	1	0	0	1	1	0	0	0	2	女
118	2021/5/18 18:23:49	127秒	微信	N/A	139.207.91.211(四川-成都)	1	3	3	0	0	0	0	1	0	0	0	0	0	0	1	1	1	1	1	0	1	0	1	1	1	3	3	3	3	3	100	5	1	1	1	0	0	1	0	1	0	0	2	女
119	2021/5/18 18:23:50	124秒	微信	N/A	117.136.70.47(四川-成都)	1	1	4	0	0	0	0	0	1	0	1	0	0	0	0	0	1	1	0	0	0	0	1	0	0	3	3	3	3	3	85	4	1	1	1	0	0	1	1	1	1	0	2	女（张雪微）
120	2021/5/18 18:23:52	105秒	手机提交	直接访问	117.172.229.254(四川-成都)	1	2	4	0	0	0	0	0	1	0	1	0	0	0	0	1	1	0	1	0	1	1	1	0	1	3	3	3	4	3	86	5	1	1	1	0	0	1	1	0	1	0	1	女
121	2021/5/18 18:23:53	269秒	微信	N/A	183.220.91.248(四川-成都)	1	2	4	1	1	1	0	1	1	0	1	1	0	1	0	0	1	1	1	0	1	1	1	0	1	4	3	4	4	4	85	4	1	1	1	0	0	1	1	0	0	0	1	女
122	2021/5/18 18:23:58	267秒	手机提交	直接访问	112.44.106.96(四川-成都)	1	1	4	0	0	0	0	0	1	0	1	0	0	0	0	0	1	1	0	0	0	0	1	0	1	3	3	3	3	2	70	4	0	1	1	0	0	0	1	0	0	0	1	女
123	2021/5/18 18:23:58	123秒	微信	N/A	110.187.235.72(四川-泸州)	1	1	2	0	1	1	0	1	0	0	1	1	1	1	0	1	1	1	1	0	0	0	1	0	0	3	3	3	3	2	100	4	1	1	1	1	0	1	1	1	1	0	2	女
124	2021/5/18 18:23:59	35秒	手机提交	直接访问	222.212.9.220(四川-成都)	2	-3	-3	-3	-3	-3	-3	-3	-3	-3	-3	-3	-3	-3	-3	-3	-3	-3	-3	-3	-3	-3	-3	-3	-3	-3	-3	-3	-3	-3	-3	4	1	1	1	0	0	1	1	0	0	0	1	女
125	2021/5/18 18:24:03	128秒	微信	N/A	101.206.167.125(四川-成都)	1	2	2	0	1	0	0	1	1	0	1	0	0	1	0	1	1	1	1	0	0	1	1	0	0	5	4	4	2	2	100	5	1	1	1	0	0	1	1	1	1	0	2	男
126	2021/5/18 18:24:05	155秒	微信	N/A	110.185.160.50(四川-成都)	1	1	4	0	1	1	0	0	0	0	1	0	0	0	0	0	0	0	1	1	0	0	1	0	0	3	3	3	3	3	91	4	1	1	0	0	0	1	0	0	1	1	1	女
127	2021/5/18 18:24:10	146秒	微信	N/A	222.211.233.73(四川-成都)	1	2	2	1	0	1	0	1	0	0	1	1	0	0	0	1	1	1	1	0	1	1	1	1	1	3	4	4	4	3	100	5	1	1	1	0	0	1	1	1	0	0	2	女
128	2021/5/18 18:24:10	155秒	手机提交	直接访问	223.104.9.139(四川-成都)	1	3	3	0	1	1	0	0	0	0	1	0	0	0	0	1	1	1	1	0	0	1	1	0	0	3	3	3	4	3	86	4	1	1	1	0	0	1	1	0	1	0	3	女
129	2021/5/18 18:24:12	155秒	微信	N/A	61.157.55.41(四川-成都)	1	3	4	0	1	0	0	1	0	1	1	1	1	1	0	1	1	1	1	0	1	1	1	1	0	3	3	4	3	3	100	4	1	1	1	0	0	1	1	0	1	0	5	女
130	2021/5/18 18:24:13	122秒	微信	N/A	118.113.69.214(四川-成都)	2	-3	-3	-3	-3	-3	-3	-3	-3	-3	-3	-3	-3	-3	-3	-3	-3	-3	-3	-3	-3	-3	-3	-3	-3	-3	-3	-3	-3	-3	-3	5	1	1	1	0	0	1	1	1	0	0	1	男
131	2021/5/18 18:24:15	50秒	手机提交	直接访问	125.70.169.12(四川-成都)	2	-3	-3	-3	-3	-3	-3	-3	-3	-3	-3	-3	-3	-3	-3	-3	-3	-3	-3	-3	-3	-3	-3	-3	-3	-3	-3	-3	-3	-3	-3	1	0	0	0	0	1	0	0	0	0	1	5	女
132	2021/5/18 18:24:18	102秒	手机提交	直接访问	61.157.13.4(四川-成都)	2	-3	-3	-3	-3	-3	-3	-3	-3	-3	-3	-3	-3	-3	-3	-3	-3	-3	-3	-3	-3	-3	-3	-3	-3	-3	-3	-3	-3	-3	-3	5	1	1	1	0	0	0	0	1	0	0	2	女
133	2021/5/18 18:24:24	66秒	微信	N/A	117.136.70.59(四川-成都)	2	-3	-3	-3	-3	-3	-3	-3	-3	-3	-3	-3	-3	-3	-3	-3	-3	-3	-3	-3	-3	-3	-3	-3	-3	-3	-3	-3	-3	-3	-3	5	1	1	1	0	0	1	1	1	1	0	3	女
134	2021/5/18 18:24:25	289秒	微信	N/A	117.136.63.134(四川-成都)	1	1	4	0	1	0	0	0	0	0	1	0	0	0	0	1	1	1	1	0	1	1	1	0	1	1	1	3	3	3	79	5	1	1	1	0	0	1	0	0	1	0	1	女
135	2021/5/18 18:24:26	118秒	微信	N/A	171.218.109.187(四川-成都)	1	1	4	0	0	0	0	0	0	1	1	0	0	0	0	1	1	1	1	0	1	1	1	0	0	3	4	4	4	4	84	4	1	1	1	0	0	1	0	0	0	0	1	女
136	2021/5/18 18:24:27	280秒	微信	N/A	222.212.96.81(四川-成都)	1	3	3	0	0	0	0	1	1	0	1	0	0	0	1	0	1	1	1	0	0	1	1	0	1	3	3	3	3	3	93	4	1	1	1	0	0	0	1	0	0	0	1	男
137	2021/5/18 18:24:27	153秒	微信	N/A	117.136.62.66(四川-成都)	1	3	2	0	0	0	0	1	0	0	1	1	1	1	0	1	1	1	1	0	0	0	1	1	0	3	3	3	3	3	81	4	1	1	1	0	0	1	1	0	1	0	3	男
138	2021/5/18 18:24:30	268秒	微信	N/A	125.70.169.84(四川-成都)	1	2	2	0	1	0	0	0	0	0	1	0	0	0	1	1	1	0	1	0	1	1	1	0	0	4	4	4	3	3	75	4	1	1	1	0	0	1	1	0	0	0	5	男
139	2021/5/18 18:24:30	171秒	微信	N/A	117.174.31.26(四川-成都)	1	2	1	0	1	0	0	0	0	1	1	1	1	1	0	1	1	1	1	0	0	0	1	0	0	4	3	4	4	3	90	5	1	1	1	0	0	1	1	0	1	0	4	男
140	2021/5/18 18:24:33	179秒	微信	N/A	119.4.253.192(四川-成都)	1	3	4	0	0	0	0	1	1	0	1	1	0	0	1	0	1	1	1	1	1	1	1	0	0	2	3	3	4	4	85	4	1	1	1	0	0	1	1	0	1	0	2	女
141	2021/5/18 18:24:39	133秒	微信	N/A	223.104.9.145(四川-成都)	1	1	4	0	0	0	0	1	0	0	0	1	0	0	0	1	1	1	1	0	0	0	1	0	0	4	4	4	4	4	100	4	1	1	1	0	0	1	0	0	0	0	2	(空)
142	2021/5/18 18:24:45	192秒	微信	N/A	171.214.215.120(四川-成都)	1	1	4	0	0	1	0	0	0	1	1	0	0	1	0	1	1	1	1	0	1	1	1	0	0	3	3	3	3	3	100	5	1	1	1	1	0	1	0	0	1	0	1	男
143	2021/5/18 18:24:50	142秒	微信	N/A	223.104.216.54(四川-成都)	1	3	4	0	0	0	0	1	0	0	0	1	0	0	0	0	1	1	0	0	0	0	1	0	0	1	1	1	3	2	93	5	1	1	1	0	0	1	1	0	0	0	1	女
144	2021/5/18 18:24:52	202秒	微信	N/A	223.104.9.243(四川-成都)	1	2	3	0	0	0	0	1	0	0	0	1	0	0	0	1	1	1	1	1	0	0	1	0	0	3	2	3	2	3	79	4	1	1	1	0	0	1	1	0	0	0	1	女
145	2021/5/18 18:24:53	50秒	微信	N/A	117.136.64.94(四川-成都)	2	-3	-3	-3	-3	-3	-3	-3	-3	-3	-3	-3	-3	-3	-3	-3	-3	-3	-3	-3	-3	-3	-3	-3	-3	-3	-3	-3	-3	-3	-3	4	0	1	0	0	0	0	0	0	1	0	3	女
146	2021/5/18 18:25:07	76秒	微信	N/A	110.191.216.66(四川-成都)	2	-3	-3	-3	-3	-3	-3	-3	-3	-3	-3	-3	-3	-3	-3	-3	-3	-3	-3	-3	-3	-3	-3	-3	-3	-3	-3	-3	-3	-3	-3	4	1	1	1	0	0	1	0	0	1	0	1	女
147	2021/5/18 18:25:07	116秒	微信	N/A	139.207.195.46(四川-成都)	1	3	2	0	0	1	0	0	1	1	1	0	0	1	0	1	1	1	1	0	1	1	1	1	0	3	3	3	3	3	89	4	1	1	1	0	0	1	0	0	0	0	1	女
148	2021/5/18 18:25:09	105秒	微信	N/A	61.157.13.15(四川-成都)	1	1	4	0	1	0	0	0	0	0	1	0	0	0	0	0	0	0	0	1	0	0	1	0	0	3	3	3	3	3	61	4	1	1	1	0	0	0	0	1	0	0	5	(空)
149	2021/5/18 18:25:20	80秒	微信	N/A	117.174.30.108(四川-成都)	1	2	2	0	0	1	0	1	1	0	1	1	1	0	0	0	0	0	1	0	0	0	1	0	0	3	4	3	3	3	80	4	1	1	1	0	0	1	0	0	0	0	2	女
150	2021/5/18 18:25:29	80秒	微信	N/A	223.104.214.225(四川-宜宾)	1	2	2	0	0	0	0	0	1	0	1	1	0	1	0	1	1	1	1	0	1	1	1	1	0	3	3	3	3	3	100	4	1	1	1	0	0	1	1	0	0	0	1	女
151	2021/5/18 18:25:31	111秒	微信	N/A	60.255.85.32(四川-成都)	1	1	4	0	0	0	0	1	0	0	0	0	0	1	0	1	0	0	1	0	0	1	1	0	0	3	3	3	2	4	51	4	1	1	1	0	0	1	0	0	0	0	1	女
152	2021/5/18 18:25:38	242秒	微信	N/A	223.104.9.229(四川-成都)	1	2	2	0	0	1	0	0	0	1	1	0	0	0	0	0	1	1	0	0	0	0	1	0	0	4	4	3	4	4	83	4	0	1	0	0	0	1	1	0	1	0	1	女
153	2021/5/18 18:25:49	177秒	微信	N/A	61.157.13.3(四川-成都)	1	1	4	0	0	1	0	1	0	0	1	1	0	0	0	1	1	0	1	0	0	0	1	0	0	3	3	3	3	3	98	4	1	1	1	0	0	1	0	0	0	0	1	女
154	2021/5/18 18:25:55	114秒	微信	N/A	171.214.214.245(四川-成都)	1	4	4	0	0	0	0	1	0	0	0	0	0	1	0	1	1	0	1	0	0	1	0	0	0	3	3	3	3	3	100	4	1	0	1	0	0	1	1	1	1	0	3	女
155	2021/5/18 18:26:06	270秒	微信	N/A	39.144.137.161(四川-成都)	1	3	2	0	1	0	0	1	0	1	1	1	0	1	0	1	1	1	1	0	1	1	1	0	1	3	4	4	4	3	82	4	1	1	1	0	0	1	1	0	1	0	2	女
156	2021/5/18 18:26:08	340秒	微信	N/A	222.209.25.29(四川-成都)	1	3	3	0	0	1	0	0	0	0	1	0	0	1	0	1	1	1	1	0	1	1	1	0	1	3	4	4	4	4	87	5	1	1	1	0	0	1	1	0	0	0	1	女
157	2021/5/18 18:26:08	78秒	微信	N/A	171.223.194.128(四川-成都)	1	1	4	1	1	0	0	0	0	0	1	0	0	0	0	1	1	1	1	0	1	0	1	0	0	2	3	3	3	3	41	3	1	1	1	0	0	1	0	0	0	0	2	女
158	2021/5/18 18:26:09	285秒	微信	N/A	171.214.215.120(四川-成都)	1	1	4	0	0	0	0	1	0	1	0	1	0	1	0	1	1	1	1	0	1	1	1	1	0	4	3	3	4	2	85	4	1	1	1	0	0	1	1	1	1	0	2	男
159	2021/5/18 18:26:29	137秒	微信	N/A	118.112.152.71(四川-成都)	2	-3	-3	-3	-3	-3	-3	-3	-3	-3	-3	-3	-3	-3	-3	-3	-3	-3	-3	-3	-3	-3	-3	-3	-3	-3	-3	-3	-3	-3	-3	3	0	0	1	0	0	0	1	0	0	0	5	女
160	2021/5/18 18:26:41	212秒	手机提交	直接访问	171.218.109.129(四川-成都)	1	3	4	0	0	1	0	1	0	0	1	1	0	0	0	0	1	1	0	0	0	0	1	0	0	3	3	3	3	3	74	4	1	1	1	0	0	1	1	0	0	0	2	男
161	2021/5/18 18:26:43	175秒	微信	N/A	171.214.215.120(四川-成都)	1	1	4	0	1	0	0	0	0	1	1	0	0	0	0	1	1	1	1	0	0	1	1	0	1	4	4	3	3	4	66	3	1	1	0	0	0	1	0	0	0	0	5	女
162	2021/5/18 18:26:45	109秒	微信	N/A	223.104.9.240(四川-成都)	1	1	4	1	0	0	0	1	0	0	1	1	1	1	0	1	1	0	1	0	1	0	1	1	0	2	2	2	4	3	83	4	1	0	0	0	0	1	0	0	0	0	4	男
163	2021/5/18 18:26:46	113秒	微信	N/A	171.214.214.51(四川-成都)	1	1	4	0	0	1	0	0	0	0	1	0	0	0	0	0	0	0	1	1	0	0	1	0	0	4	4	5	5	5	75	3	0	0	0	0	1	0	0	0	1	0	5	男
164	2021/5/18 18:26:47	149秒	微信	N/A	101.206.167.163(四川-成都)	1	2	4	1	0	1	0	0	0	0	1	0	0	1	0	0	1	0	1	0	0	0	1	0	0	3	3	3	3	3	83	3	1	1	1	0	0	1	1	0	0	0	2	男
165	2021/5/18 18:26:47	438秒	微信	N/A	171.210.236.199(四川-成都)	1	1	2	0	1	0	0	0	1	0	1	0	0	1	1	1	1	1	1	0	0	1	1	0	0	3	2	4	4	3	100	5	1	1	1	0	0	0	1	0	1	0	1	女
166	2021/5/18 18:26:48	248秒	微信	N/A	183.220.92.94(四川-成都)	1	4	4	0	0	0	0	1	0	0	0	0	0	1	0	1	1	1	1	1	1	1	1	0	1	4	3	5	4	3	91	4	1	1	1	0	0	1	1	0	1	0	4	王金峰
167	2021/5/18 18:26:48	289秒	微信	N/A	222.212.10.237(四川-成都)	1	1	3	0	1	0	0	0	0	0	1	0	0	0	0	1	1	1	1	1	0	1	1	0	0	3	4	4	3	3	88	5	1	1	1	0	0	1	1	0	1	0	1	女
168	2021/5/18 18:26:50	149秒	微信	N/A	171.223.194.124(四川-成都)	1	2	2	1	1	0	0	0	1	0	1	0	0	0	1	0	1	0	1	0	1	1	1	0	0	3	4	3	3	3	80	4	0	1	1	0	0	1	1	0	0	0	1	女
169	2021/5/18 18:26:55	318秒	手机提交	直接访问	117.139.215.101(四川-成都)	1	3	2	0	0	0	0	1	1	1	1	1	1	0	1	1	1	1	1	0	0	0	1	0	0	1	3	3	3	3	94	4	1	1	1	0	0	1	1	0	1	0	1	女
170	2021/5/18 18:26:55	51秒	手机提交	直接访问	171.93.203.241(四川-成都)	2	-3	-3	-3	-3	-3	-3	-3	-3	-3	-3	-3	-3	-3	-3	-3	-3	-3	-3	-3	-3	-3	-3	-3	-3	-3	-3	-3	-3	-3	-3	5	1	1	1	0	0	1	0	0	1	0	2	男
171	2021/5/18 18:26:58	161秒	微信	N/A	222.210.8.151(四川-成都)	1	2	3	1	1	0	1	1	0	0	1	0	0	1	0	1	1	1	1	0	1	1	1	1	1	3	3	3	2	2	76	4	1	1	1	0	0	1	1	0	1	0	1	女
172	2021/5/18 18:26:59	240秒	微信	N/A	60.255.85.171(四川-成都)	1	1	4	0	0	0	0	0	1	1	1	0	0	1	0	0	0	1	1	0	0	0	1	0	0	3	4	3	3	2	100	5	1	1	0	0	0	1	1	0	0	0	1	女
173	2021/5/18 18:27:00	98秒	微信	N/A	39.144.137.194(四川-成都)	1	2	1	0	0	0	0	0	1	0	1	0	0	1	0	1	1	0	1	0	0	1	1	0	0	3	3	4	5	5	93	4	1	1	1	0	0	1	1	0	0	0	3	姚红
174	2021/5/18 18:27:07	110秒	微信	N/A	117.136.63.188(四川-成都)	1	1	4	0	1	0	0	0	0	0	1	0	0	0	0	1	1	1	1	0	0	0	1	0	0	3	3	3	3	3	92	3	1	1	1	0	0	1	1	0	0	0	1	女
175	2021/5/18 18:27:15	127秒	微信	N/A	223.104.216.38(四川-成都)	1	3	2	0	0	0	0	1	1	0	1	1	1	1	1	0	1	1	1	0	1	0	1	1	1	3	3	3	4	4	100	5	1	1	1	0	0	1	1	0	0	0	1	男
176	2021/5/18 18:27:30	335秒	微信	N/A	222.209.149.255(四川-成都)	1	2	4	1	0	0	0	1	0	0	1	1	0	0	0	1	1	1	1	0	0	1	1	0	0	3	3	3	3	3	90	5	1	1	1	0	0	1	1	1	1	0	1	(空)
177	2021/5/18 18:27:45	134秒	微信	N/A	117.136.64.78(四川-成都)	1	1	4	0	1	0	0	1	0	1	1	1	0	0	0	1	1	1	1	0	0	1	1	0	1	3	3	3	3	2	93	4	1	1	1	0	0	1	1	0	0	0	2	女
178	2021/5/18 18:27:47	224秒	微信	N/A	101.206.167.181(四川-成都)	1	3	2	0	1	0	0	1	0	0	0	1	0	1	0	0	1	1	1	0	1	1	1	1	0	3	3	3	4	4	81	4	1	1	1	0	0	1	1	1	1	0	3	男
179	2021/5/18 18:28:43	90秒	微信	N/A	117.136.64.75(四川-成都)	1	1	1	1	1	0	0	0	0	0	1	0	0	1	0	1	1	1	1	0	1	1	1	0	0	3	4	4	3	3	81	4	1	1	1	0	0	1	1	0	0	0	3	女
180	2021/5/18 18:28:52	159秒	微信	N/A	61.157.13.10(四川-成都)	1	1	4	0	1	0	0	0	0	0	1	0	0	1	0	1	1	1	1	0	0	0	1	0	1	3	3	3	3	3	83	3	1	1	1	0	0	1	1	0	0	0	1	女
181	2021/5/18 18:28:53	146秒	微信	N/A	101.206.168.42(四川-成都)	1	1	2	0	0	0	0	0	1	1	1	0	0	1	0	1	1	1	1	0	1	1	1	0	0	1	1	1	5	1	100	5	1	1	0	0	0	1	1	0	1	0	2	女
182	2021/5/18 18:29:37	312秒	微信	N/A	125.71.227.74(四川-成都)	2	-3	-3	-3	-3	-3	-3	-3	-3	-3	-3	-3	-3	-3	-3	-3	-3	-3	-3	-3	-3	-3	-3	-3	-3	-3	-3	-3	-3	-3	-3	5	1	1	1	0	0	1	1	0	1	0	3	男
183	2021/5/18 18:30:14	332秒	微信	N/A	223.104.9.219(四川-成都)	1	3	4	1	0	1	0	1	0	0	1	0	0	1	1	1	1	1	1	0	0	0	1	0	0	3	3	3	3	2	89	5	1	1	1	0	0	1	1	0	1	0	2	女
																															1.23497	1.34973	1.44809	1.4918	1.34973	1.34973
[truncated: 2 more columns]

## Sheet: Sheet2
mental demand	physical demand	temporal demand	performance	effort	frustration
1.23497	1.34973	1.44809	1.4918	1.34973	1.3497
