# Supplementary material for: Real Workload-Situated Training in COVID-19 Prevention of General Practice Residents in China: A Situated Cognition Study
Source: Research Square preprint supplement (doi:10.21203/rs.3.rs-854514/v1), 2021-10-12
Supplement: Supplementary file 5 [file e3339a091c7a1d10418ef3bc.xlsx]

## Sheet: Sheet1
Analysis dimension		Basic theory	Training	training procedure				Evaluation of training	training environment
Analyze content		Situation	Cognitivity	Learning goal	Situation	Synthesis	Collaboration	Evaluation	real workload
Basic	A real situation		√	√	√	√	√	√	√
Principle	Real activities and responsibilities		√	√	√	√	√	√	√
	Expert performance			√	√		√	√	√
	Multiple roles and diversity		√	√	√	√	√	√	√
	Provide support and guidance			√	√	√	√	√	√
	Collaborative knowledge construction		√	√	√		√	√	√
	Pay attention to reflection		√	√	√	√	√	√
	Clear expression		√	√	√	√	√		√
	True evaluation		√	√	√	√	√	√	√
Basic Features	Context-based actions		√	√	√	√	√	√	√
	Legal margin participation			√	√	√	√
	Community of practice			√	√	√	√
